# Supplementary material
Source: publisher site journal article supplement (https://www.spandidos-publications.com/8449/downloadSupplementary)
Supplement: Supplementary file 1 [file downloadSupplementary]

Table SI. Patient-donor HLA matching report before allogeneic hematopoietic stem cell transplantation.

| Subject | Sex  | Age, years | HLA-I           |                 |                 | HLA-II          |                 |
|---------|------|------------|-----------------|-----------------|-----------------|-----------------|-----------------|
|         |      |            | HLA-A           | HLA-B           | HLA-C           | DRB1            | DQB1            |
| Patient | Male | 19         | 02:07,<br>11:01 | 40:01,<br>46:01 | 01:02,<br>07:02 | 09:01,<br>15:01 | 06:02,<br>03:03 |
| Donor   | Male | 23         | 11:01,<br>24:02 | 40:01,<br>54:01 | 01:02,<br>07:02 | 04:06,<br>15:01 | 06:02,<br>03:02 |

Patient-donor HLA compatibility with a 6/10 match at the following loci: HLA-A\*11:01; HLA-B\*40:01; HLA-C\*01:02; HLA-C\*07:02; DRB1\*15:01; and DQB1\*06:02. HLA, human leukocyte antigen.
